# Supplementary material for: Metformin abrogates pathological TNF-α-producing B cells through mTOR-dependent metabolic reprogramming in polycystic ovary syndrome
Source: PubMed Central journal article supplement (PMC9270024; doi:10.7554/elife.74713), 2022-06-24
Supplement: elife-74713-fig4-data1.pdf [file elife-74713-fig4-data1.pdf]

**Figure 4. Metformin induces mitochondrial remodeling in pathological B cells.**

A, Percentage of TNF- $\alpha$ <sup>+</sup> cells in CD19<sup>+</sup> B cells from women with PCOS stimulated with B cell-targeted activator with or without oligomycin A.

| B cells | B cells+ Olig A |
|---------|-----------------|
| 9.6     | 5.3             |
| 19.8    | 6.7             |
| 11.6    | 8.4             |
| 14.4    | 8.3             |
| 14.3    | 6.9             |

C, The length/width ratio of per mitochondria in B cells

|             |      |      |      |      |      |      |      |      |
|-------------|------|------|------|------|------|------|------|------|
| B cells     | 1.69 | 1.75 | 2.8  | 1.15 | 5    | 3.76 | 1.29 | 1.51 |
| B cells+Met | 1.06 | 1.29 | 1.04 | 1.38 | 1.12 | 1.29 | 1.27 | 1.22 |
| B cells     | 1.54 | 3.02 | 2.08 | 1.01 | 3.29 | 1.6  | 1.44 | 2.25 |
| B cells+Met | 1.51 | 1.17 | 1.4  | 1.15 | 1.21 | 1.04 | 1.22 | 1.3  |

D, The numbers of mitochondria in per B cell

|             |   |   |   |   |   |   |   |   |    |   |   |
|-------------|---|---|---|---|---|---|---|---|----|---|---|
| B cells     | 5 | 8 | 5 | 3 | 9 | 6 | 5 | 9 | 10 | 9 | 7 |
| B cells+Met | 7 | 5 | 3 | 6 | 5 | 5 | 7 | 6 | 4  | 7 | 6 |

E-G, MMP, mitochondrial mass and ROS was measured

| MMP     |             | Mitochondrial mass |             | ROS     |             |
|---------|-------------|--------------------|-------------|---------|-------------|
| B cells | B cells+Met | B cells            | B cells+Met | B cells | B cells+Met |
| 1       | 0.92        | 1                  | 0.98        | 1       | 0.17        |
| 1       | 0.94        | 1                  | 1.07        | 1       | 0.23        |
| 1       | 0.82        | 1                  | 1.01        | 1       | 0.19        |
| 1       | 0.75        | 1                  | 1.07        | 1       | 0.1         |
| 1       | 0.9         | 1                  | 0.94        | /       | /           |
