# Supplementary material for: Metformin abrogates pathological TNF-α-producing B cells through mTOR-dependent metabolic reprogramming in polycystic ovary syndrome
Source: PubMed Central journal article supplement (PMC9270024; doi:10.7554/elife.74713), 2022-06-24
Supplement: elife-74713-fig6-data1.pdf [file elife-74713-fig6-data1.pdf]

**Figure 6. Rapamycin inhibits TNF- $\alpha$  production, induces mitochondrial remodeling and reduces glucose uptake in pathological B cells.**

A, Percentage of TNF- $\alpha$ <sup>+</sup> cells in CD19<sup>+</sup> B cells

| B cells | B cells+ Rapa 5um-24h | B cells+ Rapa 5um-48h |
|---------|-----------------------|-----------------------|
| 14.3    | 5.3                   | 1.4                   |
| 12.5    | 6.1                   | 1.2                   |
| 17.2    | 4.1                   | 1.7                   |
| 7.9     | /                     | /                     |
| 12.5    | /                     | /                     |
| 15.3    | /                     | /                     |

B-E, MMP, mitochondrial mass, ROS and 2-NBDG was measured

| MMP     |              | Mitochondrial mass |              | ROS     |              | 2-NBDG  |              |
|---------|--------------|--------------------|--------------|---------|--------------|---------|--------------|
| B cells | B cells+Rapa | B cells            | B cells+Rapa | B cells | B cells+Rapa | B cells | B cells+Rapa |
| 1       | 0.48         | 1                  | 0.99         | 1       | 0.36         | 1       | 0.74         |
| 1       | 0.58         | 1                  | 0.87         | 1       | 0.31         | 1       | 0.68         |
| 1       | 0.51         | 1                  | 1.12         | 1       | 0.39         | 1       | 0.52         |
