# Supplementary material for: Metformin abrogates pathological TNF-α-producing B cells through mTOR-dependent metabolic reprogramming in polycystic ovary syndrome
Source: PubMed Central journal article supplement (PMC9270024; doi:10.7554/elife.74713), 2022-06-24
Supplement: elife-74713-fig7-data1.pdf [file elife-74713-fig7-data1.pdf]

**Figure 7. Metformin treatment improves the PCOS pathological phenotypes in DHEA-induced mice.**

C-D, Quantitative analysis of cystic follicles and corpora lutea.

| cystic follicles |      |          | corpora lutea |      |          |
|------------------|------|----------|---------------|------|----------|
| Control          | DHEA | DHEA+Met | Control       | DHEA | DHEA+Met |
| 0                | 3    | 1        | 7             | 1    | 5        |
| 0                | 2    | 1        | 6             | 3    | 2        |
| 0                | 3    | 1        | 8             | 3    | 6        |
| 0                | 2    | 3        | 7             | 0    | 4        |
| 0                | 0    | 0        | 7             | 1    | 3        |
| 0                | 4    | 4        | 4             | 2    | 6        |

F, Glucose tolerance test (GTT)

|         | Control  |      |      |      |      |      | DHEA |      |      |      |      |      |      |
|---------|----------|------|------|------|------|------|------|------|------|------|------|------|------|
| 0 min   | 4.4      | 4    | 4.3  | 4.5  | 4.3  | 4.1  | 3.9  | 3.3  | 4.2  | 3.5  | 3.5  | 3.5  | 3.5  |
| 15 min  | 16.5     | 17.3 | 16.8 | 14.7 | 16.7 | 16.5 | 24.2 | 28.8 | 17.2 | 25.8 | 24.7 | 20.9 | 22.2 |
| 30 min  | 9.5      | 12   | 9.8  | 8.6  | 11.6 | 8.4  | 22.8 | 23.3 | 14.9 | 26.7 | 11.7 | 21.5 | 27   |
| 60 min  | 8.3      | 7.7  | 7.9  | 6.8  | 8.6  | 8.3  | 11.8 | 15   | 6.7  | 13.1 | 8.6  | 9.7  | 16   |
| 90 min  | 7.1      | 7.3  | 7.4  | 6.7  | 7.3  | 6.5  | 8.8  | 6.9  | 5.2  | 11.7 | 5.6  | 7.8  | 7.3  |
| 120 min | 6.7      | 6.1  | 7.3  | 5.7  | 5.8  | 6.2  | 6.4  | 8.7  | 3.3  | 5.5  | 4.1  | 7    | 6.5  |
|         | DHEA+Met |      |      |      |      |      |      |      |      |      |      |      |      |
| 0 min   | 2.8      | 3    | 4    | 2.9  | 3.4  | 2.8  |      |      |      |      |      |      |      |
| 15 min  | 13.2     | 20.5 | 15.5 | 12.4 | 13.6 | 17.9 |      |      |      |      |      |      |      |
| 30 min  | 7.4      | 15.7 | 13   | 17.4 | 13.3 | 13.3 |      |      |      |      |      |      |      |
| 60 min  | 5.9      | 8.6  | 8.6  | 10.5 | 7.3  | 6.8  |      |      |      |      |      |      |      |
| 90 min  | 5.8      | 5.9  | 5.6  | 6.1  | 5    | 7.1  |      |      |      |      |      |      |      |
| 120 min | 5.1      | 5.2  | 5.8  | 5.9  | 5.4  | 5.6  |      |      |      |      |      |      |      |

G, GTT area under the curve

| Control | DHEA | DHEA+Met |
|---------|------|----------|
| 1057    | 1619 | 813      |
| 1101    | 1769 | 1196     |
| 1073    | 1031 | 1068     |

|       |      |       |
|-------|------|-------|
| 938.3 | 1841 | 1186  |
| 1108  | 1148 | 978.8 |
| 1004  | 1454 | 1090  |
| /     | 1763 | /     |

H, Serum TNF- $\alpha$  concentrations

| Control | DHEA  | DHEA+Met |
|---------|-------|----------|
| 4.33    | 14.72 | 5.99     |
| 3.4     | 13.82 | 7.15     |
| 4.33    | 9.65  | 8.6      |
| 3.41    | 10.32 | 6.77     |
| 3.88    | 11.63 | 6.38     |
| /       | 6.77  | /        |
