# Supplementary material for: Metformin abrogates pathological TNF-α-producing B cells through mTOR-dependent metabolic reprogramming in polycystic ovary syndrome
Source: PubMed Central journal article supplement (PMC9270024; doi:10.7554/elife.74713), 2022-06-24
Supplement: elife-74713-fig8-data1.pdf [file elife-74713-fig8-data1.pdf]

**Figure 8. Metformin inhibits TNF- $\alpha$  production, alters AMPK/PI3K/mTOR phosphorylation and induces metabolic reprogramming in pathological B cells from DHEA-induced PCOS mice.**

A, Percentage of TNF- $\alpha$ <sup>+</sup> cells in splenic CD19<sup>+</sup> B cells

|          |      |     |     |     |      |     |     |     |     |
|----------|------|-----|-----|-----|------|-----|-----|-----|-----|
| Control  | 2.6  | 1.5 | 1.5 | 3.1 | 2.5  | /   | /   | /   | /   |
| DHEA     | 11.4 | 5.7 | 7.4 | 5.7 | 11.3 | 5.5 | 5.7 | /   | /   |
| DHEA+Met | 0.5  | 1.6 | 2.6 | 7.7 | 6    | 4.9 | 2   | 0.6 | 1.4 |

B, P- AMPK (S487)/AMPK, P-PI3K p85 (Tyr458)/PI3K p85 and P-mTOR (S2481)/ mTOR in splenic B cells between DHEA-induced PCOS mice and controls.

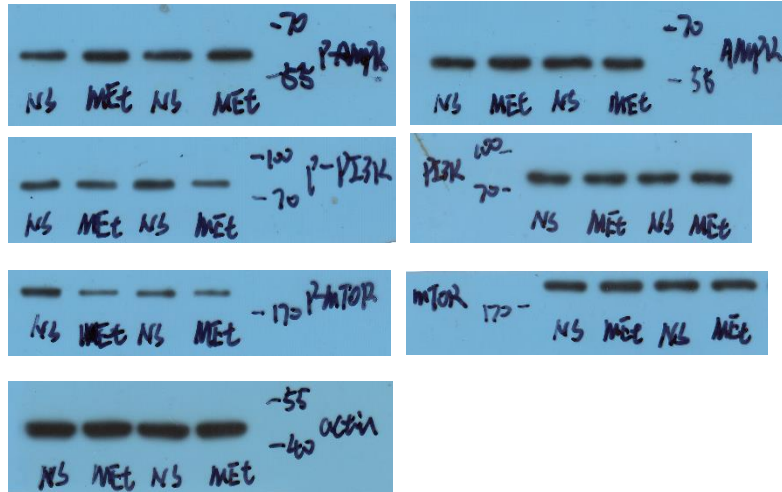

D, Differential energy metabolites were quantitatively analyzed

| Lactate  |          |          | Succinate |         |          | Fumarate |        |          |
|----------|----------|----------|-----------|---------|----------|----------|--------|----------|
| Control  | DHEA     | DHEA+Met | Control   | DHEA    | DHEA+Met | Control  | DHEA   | DHEA+Met |
| 173.0904 | 158.8494 | 383.5425 | 8.4587    | 6.6328  | 14.285   | 1.3645   | 0.3066 | 2.0179   |
| 250.2598 | 240.5514 | 438.3095 | 9.0338    | 8.0549  | 16.447   | 0.8652   | 1.349  | 2.9449   |
| 255.6909 | 262.1899 | 520.6824 | 5.0388    | 10.2961 | 20.7508  | 0.7142   | 0.7558 | 3.1855   |

| L-Malic acid |        |          | Oxaloacetate |         |          |
|--------------|--------|----------|--------------|---------|----------|
| Control      | DHEA   | DHEA+Met | Control      | DHEA    | DHEA+Met |
| 5.8868       | 9.5513 | 8.9067   | 74.9818      | 57.0697 | 108.1906 |
| 5.7234       | 7.991  | 11.2807  | 84.9568      | 57.6216 | 112.5176 |
| 5.2725       | 6.3785 | 14.3058  | 58.2695      | 87.096  | 139.9998 |
