# Supplementary material for: Metformin abrogates pathological TNF-α-producing B cells through mTOR-dependent metabolic reprogramming in polycystic ovary syndrome
Source: eLife journal article supplement (doi:10.7554/elife.74713), 2022-06-24
Supplement: fig2-data1 [file elife-74713-fig2-data1-v2.pdf]

**Figure 2. Metformin inhibits TNF- $\alpha$  production by pathological B cells in PCOS.**

A, TNF- $\alpha$  expression in stimulated B cells from women with PCOS with or without metformin.

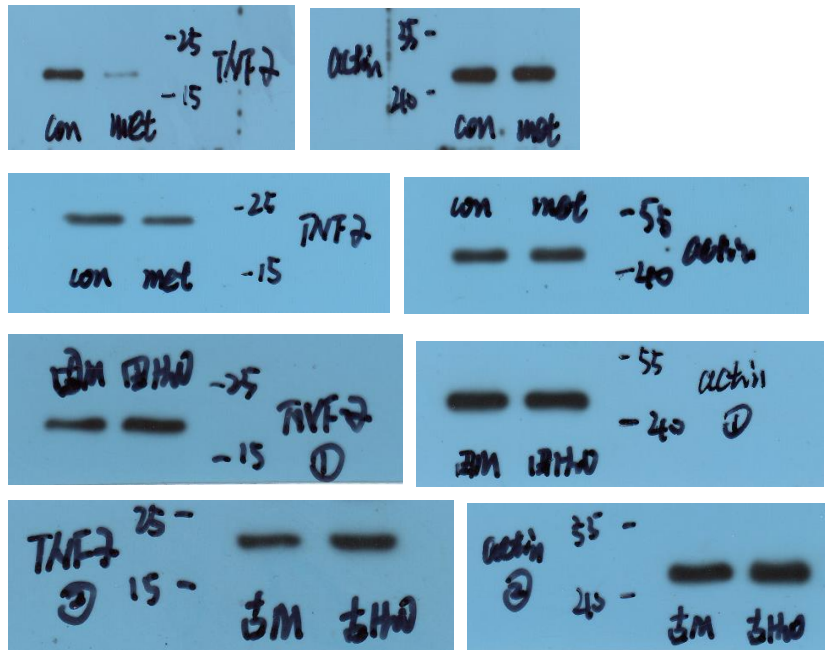

| B cells TNF- $\alpha$ / $\beta$ actin | B cells+Met- TNF- $\alpha$ / $\beta$ actin |
|---------------------------------------|--------------------------------------------|
| 0.55                                  | 0.32                                       |
| 0.4                                   | 0.28                                       |
| 0.61                                  | 0.06                                       |
| 0.32                                  | 0.18                                       |

B, Percentage of TNF- $\alpha$ <sup>+</sup> cells in CD19<sup>+</sup> B cells

| B cells | B cells+Met |
|---------|-------------|
| 10.4    | 2.7         |
| 8       | 0.6         |
| 8.3     | 2.3         |
| 11.5    | 3.4         |
| 10      | 0.7         |
| 5.8     | 0.2         |

C, TNF- $\alpha$  mRNA expression levels in B cells

| B cells | B cells+Met |
|---------|-------------|
| 1       | 1.12        |
| 1.83    | 2.67        |
| 1.37    | 1.61        |

|      |      |
|------|------|
| 1    | 1.19 |
| 1.35 | 0.28 |
| 0.61 | 1.22 |

D, Percentage of TNF- $\alpha$ <sup>+</sup> cells in CD19<sup>+</sup> B cells from women with PCOS, before (pre) and after (post) treatment with metformin

| Pre Met | Post Met |
|---------|----------|
| 10.8    | 7.4      |
| 12      | 8.6      |
| 9.1     | 7.4      |

**Fig supplement 1: Metformin does not affect B cell proliferation and apoptosis.**

B-D, The ratios of alive, early apoptotic and dead cells in B cells by flow cytometry

| alive cells |             | early apoptotic cells |             | dead cells |             |
|-------------|-------------|-----------------------|-------------|------------|-------------|
| B cells     | B cells+Met | B cells               | B cells+Met | B cells    | B cells+Met |
| 75.2        | 81.8        | 6.4                   | 5.3         | 11.4       | 8.2         |
| 71          | 66.3        | 10                    | 11          | 13.1       | 15.3        |
| 85.1        | 86.8        | 6.2                   | 5.9         | 7.4        | 6.4         |
| 77.6        | 79          | 10.9                  | 9.9         | 10.1       | 10          |
