# Supplementary material for: Metformin abrogates pathological TNF-α-producing B cells through mTOR-dependent metabolic reprogramming in polycystic ovary syndrome
Source: eLife journal article supplement (doi:10.7554/elife.74713), 2022-06-24
Supplement: supp [file elife_poa_e74713_Figure_1_source_data_1.pdf › elife_poa_e74713_Figure_1_source_data_1.pdf]

**Figure 1. TNF- $\alpha$  production by pathological B cells in women with PCOS.**

A, Serum TNF- $\alpha$  concentration

| Control | PCOS  | PCOS  |
|---------|-------|-------|
| 23.59   | 45.23 | 47.87 |
| 28.76   | 53.24 | 39.66 |
| 34.3    | 45.93 | 29.92 |
| 25.61   | 26.8  | 35.61 |
| 38.01   | 42.19 | 54.44 |
| 15.98   | 15.76 | 52.73 |
| 33.36   | 42.19 | 27.59 |
| 37.83   | 57.33 | 17.08 |
| 35.05   | 46.29 | 47.87 |
| 41.65   | 23.18 | 48.04 |
| 20.29   | 59.51 | 38.93 |
| 49.61   | 41.83 | 43.45 |
| 21.54   | 26.00 | /     |

B, TNF- $\alpha$  expression in CD19<sup>+</sup> B cells was determined by western blot

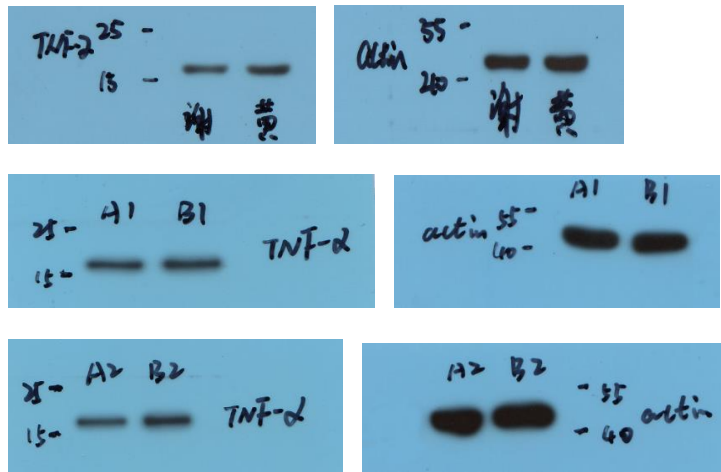

| Control- TNF- $\alpha$ / $\beta$ actin | PCOS- TNF- $\alpha$ / $\beta$ actin |
|----------------------------------------|-------------------------------------|
| 0.24                                   | 0.36                                |
| 0.15                                   | 0.26                                |
| 0.24                                   | 0.4                                 |

C, Percentage of TNF- $\alpha$ <sup>+</sup> cells in CD19<sup>+</sup> B cells

| Control | PCOS | PCOS |
|---------|------|------|
| 4.9     | 13.6 | 14.6 |
| 7.3     | 9.5  | 16   |
| 10.5    | 8.8  | 13   |
| 6.1     | 15.8 | 12   |
| 5.6     | 11.9 | 8.7  |
| 5.2     | 18.8 | 14.3 |

|     |      |      |
|-----|------|------|
| 7.5 | 11.7 | 17.2 |
| /   | /    | 7.9  |

D, TNF- $\alpha$  in the culture supernatants (sup.)

|         |        |
|---------|--------|
| Control | PCOS   |
| 105.16  | 206.77 |
| 171.16  | 297.72 |
| 163.26  | 292.73 |
| 152.41  | /      |

E, the correlation between the percentage of TNF- $\alpha$ <sup>+</sup> cells in CD19<sup>+</sup> B cells and serum AMH levels by Pearson's correlation analyses.

|                                                                   |      |       |      |       |       |      |      |      |       |      |
|-------------------------------------------------------------------|------|-------|------|-------|-------|------|------|------|-------|------|
| TNF- $\alpha$ <sup>+</sup> cells in CD19 <sup>+</sup> B cells (%) | 4.9  | 7.3   | 10.5 | 6.1   | 5.6   | 5.2  | 7.5  | 13.6 | 9.5   | /    |
| AMH                                                               | 1.99 | 10.51 | 3.34 | 4.16  | 10.8  | 1.74 | 1.78 | 6.56 | 22.73 | /    |
| TNF- $\alpha$ <sup>+</sup> cells in CD19 <sup>+</sup> B cells (%) | 8.8  | 15.8  | 11.9 | 18.8  | 11.7  | 16   | 13   | 8.7  | 17.2  | 7.9  |
| AMH                                                               | 8.03 | 15.61 | 7.77 | 15.49 | 10.46 | 9.94 | 9.71 | 5.67 | 12.82 | 7.41 |

F, IL-6, IL-8, IFN- $\gamma$ , TNF- $\alpha$ , CCL2 and CCL20 mRNAs expression levels in granulosa cells were measured by qPCR.

| IL-6    |               | IL-8    |               | IFN- $\gamma$ |               | TNF- $\alpha$ |               | CCL2    |               | CCL20   |               |
|---------|---------------|---------|---------------|---------------|---------------|---------------|---------------|---------|---------------|---------|---------------|
| Control | TNF- $\alpha$ | Control | TNF- $\alpha$ | Control       | TNF- $\alpha$ | Control       | TNF- $\alpha$ | Control | TNF- $\alpha$ | Control | TNF- $\alpha$ |
| 1       | 12.87         | 1       | 43.28         | 1             | 0.45          | 1             | 1.31          | 1       | 23.35         | 1       | 13.13         |
| 2.23    | 9.35          | 1.53    | 35.26         | 1.05          | 3.46          | 0.61          | 3.57          | 0.55    | 6.06          | 0.69    | 6.66          |
| 1       | 3.46          | 1       | 23.02         | 1             | 1.38          | 1             | 1.43          | 1       | 3.69          | 1       | 2.81          |
| 3.81    | 5.11          | 1.46    | 26.72         | 1.43          | 1             | 1.08          | 0.42          | 1.58    | 1.34          | 1.56    | 1.59          |
| 1       | 6.66          | 1       | 35.63         | 1             | 0.46          | 1             | 1.24          | 1       | 6.59          | 1       | 6.54          |
| 1       | 5.56          | 1       | 16.51         | 1             | 0.18          | 1             | 1.9           | 1       | 3.96          | 1       | 4.36          |
| 1.75    | 28.44         | 0.71    | 36.38         | 2.23          | 1.32          | 1.78          | 1.28          | 1.11    | 5.66          | 1.08    | 5.74          |
