# Supplementary material for: Metformin abrogates pathological TNF-α-producing B cells through mTOR-dependent metabolic reprogramming in polycystic ovary syndrome
Source: eLife journal article supplement (doi:10.7554/elife.74713), 2022-06-24
Supplement: supp [file elife_poa_e74713_Figure_5_source_data_1.pdf › elife_poa_e74713_Figure_5_source_data_1.pdf]

**Figure 5. Metformin reduces glucose uptake in pathological B cells.**

A, Glucose uptake was measured

|             |      |      |      |      |      |      |      |
|-------------|------|------|------|------|------|------|------|
| B cells     | 1    | 1    | 1    | 1    | 1    | 1    | 1    |
| B cells+Met | 0.63 | 0.53 | 0.62 | 0.92 | 0.96 | 0.95 | 0.57 |

B-D, Glut 1 and Glut 4 expression in CD19<sup>+</sup> B cells by western blot

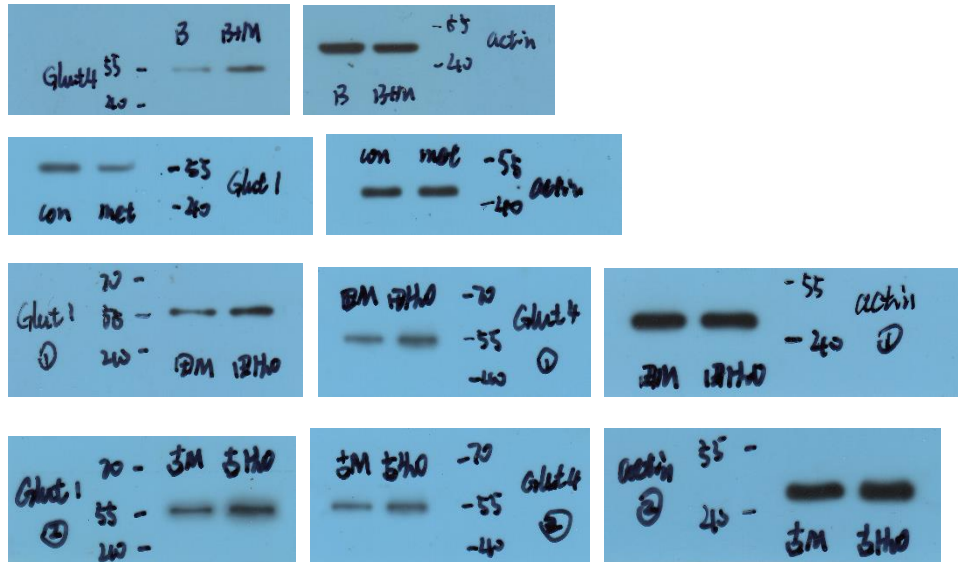

| Glut 1/β actin |             | Glut 4/β actin |             |
|----------------|-------------|----------------|-------------|
| B cells        | B cells+Met | B cells        | B cells+Met |
| 0.32           | 0.1         | 0.33           | 0.1         |
| 0.37           | 0.13        | 0.23           | 0.13        |
| 0.37           | 0.14        | 0.32           | 0.05        |

E-F, Percentage of Glut 1<sup>+</sup> cells and Glut 4<sup>+</sup> cells in CD19<sup>+</sup> B cells

|    | Glut 1 <sup>+</sup> cells-B cells      |     |     |     |     |     |     |     | Glut 4 <sup>+</sup> cells-B cells      |     |      |      |      |     |     |     |
|----|----------------------------------------|-----|-----|-----|-----|-----|-----|-----|----------------------------------------|-----|------|------|------|-----|-----|-----|
|    | 30min                                  | 2.4 | 1.1 | 1.2 | 0.7 | 1.5 | 1.9 | /   | /                                      | 8.6 | 11.4 | 11.1 | 12.3 | 5.9 | 8.1 | 4.8 |
| 4h | 9.5                                    | 4.7 | 4.3 | 4.1 | 3   | 2   | 1.8 | 5.7 | 0.3                                    | 0.5 | 0.7  | 1.1  | 0.2  | 0   | /   | /   |
|    | Glut 1 <sup>+</sup> cells -B cells+Met |     |     |     |     |     |     |     | Glut 4 <sup>+</sup> cells- B cells+Met |     |      |      |      |     |     |     |
|    | 30min                                  | 2.4 | 1.2 | 1.1 | 0.3 | 1.5 | 0.5 | /   | /                                      | 3   | 8.5  | 10.6 | 3.5  | 4.2 | 6   | 5   |
| 4h | 7.9                                    | 3.4 | 2   | 2.9 | 3.4 | 2.4 | 1.4 | 4   | 1.2                                    | 0.5 | 0.8  | 1.2  | 0.5  | 0.2 | /   | /   |

G-I, HIF1α and c-Myc expression in CD19<sup>+</sup> B cells by western blot

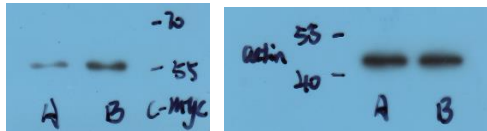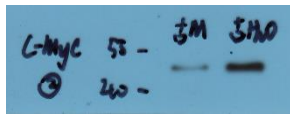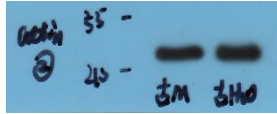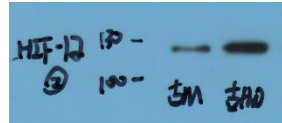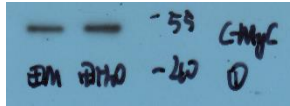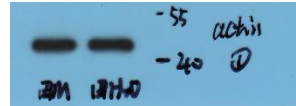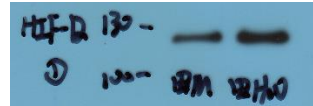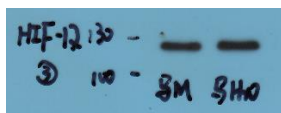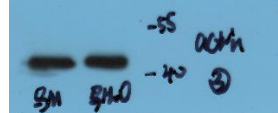

| HIF1α /β actin |             | c-Myc /β actin |             |
|----------------|-------------|----------------|-------------|
| B cells        | B cells+Met | B cells        | B cells+Met |
| 0.55           | 0.22        | 0.32           | 0.2         |
| 0.53           | 0.09        | 0.35           | 0.03        |
| 0.51           | 0.37        | 0.39           | 0.09        |
